# Supplementary material for: The Effect of Therapeutic Adherence on the Effectiveness of a Digital Therapeutic Exercise Program: A Propensity Score Matching Analysis
Source: MDPI journal article supplement (doi:10.3390/healthcare11192614), 2023-09-23
Supplement: s1 [file s1]

**Supplementary File 1:** Assessment of the distribution of each baseline covariate included in the estimation of the propensity scores (PS) between the exposed and unexposed patients across the quintiles of the PS.

```
. do "/var/folders/hz/9r6gkdps2lddy1b13x2kxkk80000gq/T//SD17798.000000"
```

```
. by quantile_hi treatment_binary_hi, sort: tabulate female
```

```
-> quantile_hi = 1, treatment_binary_hi = 0
```

| female | Freq. | Percent | Cum.   |
|--------|-------|---------|--------|
| 0      | 183   | 28.20   | 28.20  |
| 1      | 466   | 71.80   | 100.00 |
| Total  | 649   | 100.00  |        |

```
-> quantile_hi = 1, treatment_binary_hi = 1
```

| female | Freq. | Percent | Cum.   |
|--------|-------|---------|--------|
| 0      | 240   | 27.27   | 27.27  |
| 1      | 640   | 72.73   | 100.00 |
| Total  | 880   | 100.00  |        |

```
-> quantile_hi = 2, treatment_binary_hi = 0
```

| female | Freq. | Percent | Cum.   |
|--------|-------|---------|--------|
| 0      | 160   | 26.85   | 26.85  |
| 1      | 436   | 73.15   | 100.00 |
| Total  | 596   | 100.00  |        |

```
-> quantile_hi = 2, treatment_binary_hi = 1
```

| female | Freq. | Percent | Cum.   |
|--------|-------|---------|--------|
| 0      | 295   | 31.75   | 31.75  |
| 1      | 634   | 68.25   | 100.00 |
| Total  | 929   | 100.00  |        |

```
-> quantile_hi = 3, treatment_binary_hi = 0
```

| female | Freq. | Percent | Cum.   |
|--------|-------|---------|--------|
| 0      | 145   | 28.71   | 28.71  |
| 1      | 360   | 71.29   | 100.00 |
| Total  | 505   | 100.00  |        |

```
-> quantile_hi = 3, treatment_binary_hi = 1
```

| female | Freq. | Percent | Cum.   |
|--------|-------|---------|--------|
| 0      | 294   | 28.82   | 28.82  |
| 1      | 726   | 71.18   | 100.00 |
| Total  | 1,020 | 100.00  |        |

-> quantile\_hi = 4, treatment\_binary\_hi = 0

| female | Freq. | Percent | Cum.   |
|--------|-------|---------|--------|
| 0      | 132   | 27.44   | 27.44  |
| 1      | 349   | 72.56   | 100.00 |
| Total  | 481   | 100.00  |        |

-> quantile\_hi = 4, treatment\_binary\_hi = 1

| female | Freq. | Percent | Cum.   |
|--------|-------|---------|--------|
| 0      | 271   | 25.81   | 25.81  |
| 1      | 779   | 74.19   | 100.00 |
| Total  | 1,050 | 100.00  |        |

-> quantile\_hi = 5, treatment\_binary\_hi = 0

| female | Freq. | Percent | Cum.   |
|--------|-------|---------|--------|
| 0      | 154   | 34.00   | 34.00  |
| 1      | 299   | 66.00   | 100.00 |
| Total  | 453   | 100.00  |        |

-> quantile\_hi = 5, treatment\_binary\_hi = 1

| female | Freq. | Percent | Cum.   |
|--------|-------|---------|--------|
| 0      | 343   | 32.21   | 32.21  |
| 1      | 722   | 67.79   | 100.00 |
| Total  | 1,065 | 100.00  |        |

. by quantile\_hi treatment\_binary\_hi, sort: tabulate CPT\_baseline

-> quantile\_hi = 1, treatment\_binary\_hi = 0

| CPT_baseline | Freq. | Percent | Cum.   |
|--------------|-------|---------|--------|
| 0            | 443   | 68.26   | 68.26  |
| 1            | 206   | 31.74   | 100.00 |
| Total        | 649   | 100.00  |        |

-> quantile\_hi = 1, treatment\_binary\_hi = 1

| CPT_baseline | Freq. | Percent | Cum.   |
|--------------|-------|---------|--------|
| 0            | 596   | 67.73   | 67.73  |
| 1            | 284   | 32.27   | 100.00 |
| Total        | 880   | 100.00  |        |

-> quantile\_hi = 2, treatment\_binary\_hi = 0

| CPT_baselin<br>e | Freq. | Percent | Cum.   |
|------------------|-------|---------|--------|
| 0                | 405   | 67.95   | 67.95  |
| 1                | 191   | 32.05   | 100.00 |
| Total            | 596   | 100.00  |        |

-> quantile\_hi = 2, treatment\_binary\_hi = 1

| CPT_baselin<br>e | Freq. | Percent | Cum.   |
|------------------|-------|---------|--------|
| 0                | 633   | 68.14   | 68.14  |
| 1                | 296   | 31.86   | 100.00 |
| Total            | 929   | 100.00  |        |

-> quantile\_hi = 3, treatment\_binary\_hi = 0

| CPT_baselin<br>e | Freq. | Percent | Cum.   |
|------------------|-------|---------|--------|
| 0                | 325   | 64.36   | 64.36  |
| 1                | 180   | 35.64   | 100.00 |
| Total            | 505   | 100.00  |        |

-> quantile\_hi = 3, treatment\_binary\_hi = 1

| CPT_baselin<br>e | Freq. | Percent | Cum.   |
|------------------|-------|---------|--------|
| 0                | 653   | 64.02   | 64.02  |
| 1                | 367   | 35.98   | 100.00 |
| Total            | 1,020 | 100.00  |        |

-> quantile\_hi = 4, treatment\_binary\_hi = 0

| CPT_baselin<br>e | Freq. | Percent | Cum.   |
|------------------|-------|---------|--------|
| 0                | 315   | 65.49   | 65.49  |
| 1                | 166   | 34.51   | 100.00 |
| Total            | 481   | 100.00  |        |

-> quantile\_hi = 4, treatment\_binary\_hi = 1

| CPT_baselin<br>e | Freq. | Percent | Cum.   |
|------------------|-------|---------|--------|
| 0                | 699   | 66.57   | 66.57  |
| 1                | 351   | 33.43   | 100.00 |
| Total            | 1,050 | 100.00  |        |

-> quantile\_hi = 5, treatment\_binary\_hi = 0

| CPT_baselin<br>e | Freq. | Percent | Cum.   |
|------------------|-------|---------|--------|
| 0                | 319   | 70.42   | 70.42  |
| 1                | 134   | 29.58   | 100.00 |
| Total            | 453   | 100.00  |        |

-> quantile\_hi = 5, treatment\_binary\_hi = 1

| CPT_baselin<br>e | Freq. | Percent | Cum.   |
|------------------|-------|---------|--------|
| 0                | 756   | 70.99   | 70.99  |
| 1                | 309   | 29.01   | 100.00 |
| Total            | 1,065 | 100.00  |        |

. by quantile\_hi treatment\_binary\_hi, sort: tabulate CPM\_baseline

-> quantile\_hi = 1, treatment\_binary\_hi = 0

| CPM_baselin<br>e | Freq. | Percent | Cum.   |
|------------------|-------|---------|--------|
| 0                | 433   | 66.72   | 66.72  |
| 1                | 216   | 33.28   | 100.00 |
| Total            | 649   | 100.00  |        |

-> quantile\_hi = 1, treatment\_binary\_hi = 1

| CPM_baselin<br>e | Freq. | Percent | Cum.   |
|------------------|-------|---------|--------|
| 0                | 591   | 67.16   | 67.16  |
| 1                | 289   | 32.84   | 100.00 |
| Total            | 880   | 100.00  |        |

-> quantile\_hi = 2, treatment\_binary\_hi = 0

| CPM_baselin<br>e | Freq. | Percent | Cum.   |
|------------------|-------|---------|--------|
| 0                | 424   | 71.14   | 71.14  |
| 1                | 172   | 28.86   | 100.00 |
| Total            | 596   | 100.00  |        |

-> quantile\_hi = 2, treatment\_binary\_hi = 1

| CPM_baselin<br>e | Freq. | Percent | Cum.   |
|------------------|-------|---------|--------|
| 0                | 674   | 72.55   | 72.55  |
| 1                | 255   | 27.45   | 100.00 |
| Total            | 929   | 100.00  |        |

-> quantile\_hi = 3, treatment\_binary\_hi = 0

| CPM_baseline<br>e | Freq. | Percent | Cum.   |
|-------------------|-------|---------|--------|
| 0                 | 333   | 65.94   | 65.94  |
| 1                 | 172   | 34.06   | 100.00 |
| Total             | 505   | 100.00  |        |

-> quantile\_hi = 3, treatment\_binary\_hi = 1

| CPM_baseline<br>e | Freq. | Percent | Cum.   |
|-------------------|-------|---------|--------|
| 0                 | 686   | 67.25   | 67.25  |
| 1                 | 334   | 32.75   | 100.00 |
| Total             | 1,020 | 100.00  |        |

-> quantile\_hi = 4, treatment\_binary\_hi = 0

| CPM_baseline<br>e | Freq. | Percent | Cum.   |
|-------------------|-------|---------|--------|
| 0                 | 348   | 72.35   | 72.35  |
| 1                 | 133   | 27.65   | 100.00 |
| Total             | 481   | 100.00  |        |

-> quantile\_hi = 4, treatment\_binary\_hi = 1

| CPM_baseline<br>e | Freq. | Percent | Cum.   |
|-------------------|-------|---------|--------|
| 0                 | 758   | 72.19   | 72.19  |
| 1                 | 292   | 27.81   | 100.00 |
| Total             | 1,050 | 100.00  |        |

-> quantile\_hi = 5, treatment\_binary\_hi = 0

| CPM_baseline<br>e | Freq. | Percent | Cum.   |
|-------------------|-------|---------|--------|
| 0                 | 407   | 89.85   | 89.85  |
| 1                 | 46    | 10.15   | 100.00 |
| Total             | 453   | 100.00  |        |

-> quantile\_hi = 5, treatment\_binary\_hi = 1

| CPM_baseline<br>e | Freq. | Percent | Cum.   |
|-------------------|-------|---------|--------|
| 0                 | 940   | 88.26   | 88.26  |
| 1                 | 125   | 11.74   | 100.00 |
| Total             | 1,065 | 100.00  |        |

. by quantile\_hi treatment\_binary\_hi, sort: tabulate ChP\_baseline

---

-> quantile\_hi = 1, treatment\_binary\_hi = 0

| ChP_baselin<br>e | Freq. | Percent | Cum.   |
|------------------|-------|---------|--------|
| <hr/>            |       |         |        |
| 0                | 199   | 30.66   | 30.66  |
| 1                | 450   | 69.34   | 100.00 |
| <hr/>            |       |         |        |
| Total            | 649   | 100.00  |        |

---

-> quantile\_hi = 1, treatment\_binary\_hi = 1

| ChP_baselin<br>e | Freq. | Percent | Cum.   |
|------------------|-------|---------|--------|
| <hr/>            |       |         |        |
| 0                | 257   | 29.20   | 29.20  |
| 1                | 623   | 70.80   | 100.00 |
| <hr/>            |       |         |        |
| Total            | 880   | 100.00  |        |

---

-> quantile\_hi = 2, treatment\_binary\_hi = 0

| ChP_baselin<br>e | Freq. | Percent | Cum.   |
|------------------|-------|---------|--------|
| <hr/>            |       |         |        |
| 0                | 200   | 33.56   | 33.56  |
| 1                | 396   | 66.44   | 100.00 |
| <hr/>            |       |         |        |
| Total            | 596   | 100.00  |        |

---

-> quantile\_hi = 2, treatment\_binary\_hi = 1

| ChP_baselin<br>e | Freq. | Percent | Cum.   |
|------------------|-------|---------|--------|
| <hr/>            |       |         |        |
| 0                | 315   | 33.91   | 33.91  |
| 1                | 614   | 66.09   | 100.00 |
| <hr/>            |       |         |        |
| Total            | 929   | 100.00  |        |

---

-> quantile\_hi = 3, treatment\_binary\_hi = 0

| ChP_baselin<br>e | Freq. | Percent | Cum.   |
|------------------|-------|---------|--------|
| <hr/>            |       |         |        |
| 0                | 160   | 31.68   | 31.68  |
| 1                | 345   | 68.32   | 100.00 |
| <hr/>            |       |         |        |
| Total            | 505   | 100.00  |        |

---

-> quantile\_hi = 3, treatment\_binary\_hi = 1

| ChP_baselin<br>e | Freq. | Percent | Cum.   |
|------------------|-------|---------|--------|
| <hr/>            |       |         |        |
| 0                | 338   | 33.14   | 33.14  |
| 1                | 682   | 66.86   | 100.00 |
| <hr/>            |       |         |        |
| Total            | 1,020 | 100.00  |        |

-> quantile\_hi = 4, treatment\_binary\_hi = 0

| ChP_baselin<br>e | Freq. | Percent | Cum.   |
|------------------|-------|---------|--------|
| 0                | 142   | 29.52   | 29.52  |
| 1                | 339   | 70.48   | 100.00 |
| Total            | 481   | 100.00  |        |

-> quantile\_hi = 4, treatment\_binary\_hi = 1

| ChP_baselin<br>e | Freq. | Percent | Cum.   |
|------------------|-------|---------|--------|
| 0                | 317   | 30.19   | 30.19  |
| 1                | 733   | 69.81   | 100.00 |
| Total            | 1,050 | 100.00  |        |

-> quantile\_hi = 5, treatment\_binary\_hi = 0

| ChP_baselin<br>e | Freq. | Percent | Cum.   |
|------------------|-------|---------|--------|
| 0                | 162   | 35.76   | 35.76  |
| 1                | 291   | 64.24   | 100.00 |
| Total            | 453   | 100.00  |        |

-> quantile\_hi = 5, treatment\_binary\_hi = 1

| ChP_baselin<br>e | Freq. | Percent | Cum.   |
|------------------|-------|---------|--------|
| 0                | 379   | 35.59   | 35.59  |
| 1                | 686   | 64.41   | 100.00 |
| Total            | 1,065 | 100.00  |        |

. by quantile\_hi treatment\_binary\_hi, sort: summarize \_06\_age \_11\_init\_pain\_score treatment\_hat\_hi

-> quantile\_hi = 1, treatment\_binary\_hi = 0

| Variable     | Obs | Mean     | Std. dev. | Min      | Max      |
|--------------|-----|----------|-----------|----------|----------|
| _06_age      | 649 | 27.83205 | 6.228753  | 18       | 44       |
| _11_init_p~e | 649 | 5.912173 | 1.837535  | 2        | 10       |
| treatme~t_hi | 649 | .5807995 | .0180874  | .5100691 | .6058134 |

-> quantile\_hi = 1, treatment\_binary\_hi = 1

| Variable     | Obs | Mean     | Std. dev. | Min      | Max      |
|--------------|-----|----------|-----------|----------|----------|
| _06_age      | 880 | 27.725   | 6.27303   | 18       | 45       |
| _11_init_p~e | 880 | 5.935227 | 1.772405  | 1        | 10       |
| treatme~t_hi | 880 | .5803038 | .0180789  | .5172513 | .6058134 |

-> quantile\_hi = 2, treatment\_binary\_hi = 0

| Variable     | Obs | Mean     | Std. dev. | Min      | Max      |
|--------------|-----|----------|-----------|----------|----------|
| _06_age      | 596 | 38.36577 | 5.777421  | 27       | 53       |
| _11_init_p~e | 596 | 5.540268 | 1.81035   | 1        | 10       |
| treatme~t_hi | 596 | .6210038 | .0092143  | .6058758 | .6370836 |

-> quantile\_hi = 2, treatment\_binary\_hi = 1

| Variable     | Obs | Mean     | Std. dev. | Min     | Max      |
|--------------|-----|----------|-----------|---------|----------|
| _06_age      | 929 | 38.324   | 5.836076  | 27      | 54       |
| _11_init_p~e | 929 | 5.517761 | 1.826516  | 1       | 10       |
| treatme~t_hi | 929 | .6216189 | .0089381  | .605841 | .6370836 |

-> quantile\_hi = 3, treatment\_binary\_hi = 0

| Variable     | Obs | Mean     | Std. dev. | Min      | Max      |
|--------------|-----|----------|-----------|----------|----------|
| _06_age      | 505 | 47.58614 | 5.841237  | 36       | 61       |
| _11_init_p~e | 505 | 5.50495  | 1.725301  | 1        | 10       |
| treatme~t_hi | 505 | .650987  | .0076572  | .6370959 | .6642949 |

-> quantile\_hi = 3, treatment\_binary\_hi = 1

| Variable     | Obs   | Mean     | Std. dev. | Min      | Max      |
|--------------|-------|----------|-----------|----------|----------|
| _06_age      | 1,020 | 47.36863 | 5.912296  | 35       | 63       |
| _11_init_p~e | 1,020 | 5.497059 | 1.831196  | 1        | 10       |
| treatme~t_hi | 1,020 | .6507318 | .0076292  | .6371226 | .6642949 |

-> quantile\_hi = 4, treatment\_binary\_hi = 0

| Variable     | Obs | Mean     | Std. dev. | Min      | Max      |
|--------------|-----|----------|-----------|----------|----------|
| _06_age      | 481 | 54.97297 | 4.775949  | 43       | 68       |
| _11_init_p~e | 481 | 5.424116 | 1.637758  | 1        | 10       |
| treatme~t_hi | 481 | .6772785 | .0075312  | .6643696 | .6905739 |

-> quantile\_hi = 4, treatment\_binary\_hi = 1

| Variable     | Obs   | Mean     | Std. dev. | Min     | Max      |
|--------------|-------|----------|-----------|---------|----------|
| _06_age      | 1,050 | 55.05905 | 4.93488   | 42      | 70       |
| _11_init_p~e | 1,050 | 5.426667 | 1.725393  | 1       | 10       |
| treatme~t_hi | 1,050 | .6775119 | .0076344  | .664406 | .6905739 |

-> quantile\_hi = 5, treatment\_binary\_hi = 0

| Variable     | Obs | Mean     | Std. dev. | Min      | Max      |
|--------------|-----|----------|-----------|----------|----------|
| _06_age      | 453 | 63.0883  | 6.194214  | 53       | 90       |
| _11_init_p~e | 453 | 4.962472 | 1.672501  | 1        | 10       |
| treatme~t_hi | 453 | .7095527 | .0157213  | .6907577 | .7621484 |

-> quantile\_hi = 5, treatment\_binary\_hi = 1

| Variable | Obs   | Mean    | Std. dev. | Min | Max |
|----------|-------|---------|-----------|-----|-----|
| _06_age  | 1,065 | 63.8216 | 6.290142  | 51  | 87  |



```
_11_init_p~e | 1,065 4.902347 1.739048 1 10
treatme~t_hi | 1,065 .7114657 .016725 .6906803 .7861035
```

```
.
. by quantile_ii treatment_binary_ii, sort: tabulate female
```

```
-> quantile_ii = 1, treatment_binary_ii = 0
```

| female | Freq. | Percent | Cum.   |
|--------|-------|---------|--------|
| 0      | 343   | 26.43   | 26.43  |
| 1      | 955   | 73.57   | 100.00 |
| Total  | 1,298 | 100.00  |        |

```
-> quantile_ii = 1, treatment_binary_ii = 1
```

| female | Freq. | Percent | Cum.   |
|--------|-------|---------|--------|
| 0      | 70    | 30.70   | 30.70  |
| 1      | 158   | 69.30   | 100.00 |
| Total  | 228   | 100.00  |        |

```
-> quantile_ii = 2, treatment_binary_ii = 0
```

| female | Freq. | Percent | Cum.   |
|--------|-------|---------|--------|
| 0      | 334   | 26.11   | 26.11  |
| 1      | 945   | 73.89   | 100.00 |
| Total  | 1,279 | 100.00  |        |

```
-> quantile_ii = 2, treatment_binary_ii = 1
```

| female | Freq. | Percent | Cum.   |
|--------|-------|---------|--------|
| 0      | 62    | 25.00   | 25.00  |
| 1      | 186   | 75.00   | 100.00 |
| Total  | 248   | 100.00  |        |

```
-> quantile_ii = 3, treatment_binary_ii = 0
```

| female | Freq. | Percent | Cum.   |
|--------|-------|---------|--------|
| 0      | 390   | 30.30   | 30.30  |
| 1      | 897   | 69.70   | 100.00 |
| Total  | 1,287 | 100.00  |        |

```
-> quantile_ii = 3, treatment_binary_ii = 1
```

| female | Freq. | Percent | Cum.   |
|--------|-------|---------|--------|
| 0      | 74    | 30.83   | 30.83  |
| 1      | 166   | 69.17   | 100.00 |
| Total  | 240   | 100.00  |        |

-> quantile\_ii = 4, treatment\_binary\_ii = 0

| female | Freq. | Percent | Cum.   |
|--------|-------|---------|--------|
| 0      | 360   | 29.95   | 29.95  |
| 1      | 842   | 70.05   | 100.00 |
| Total  | 1,202 | 100.00  |        |

-> quantile\_ii = 4, treatment\_binary\_ii = 1

| female | Freq. | Percent | Cum.   |
|--------|-------|---------|--------|
| 0      | 83    | 25.86   | 25.86  |
| 1      | 238   | 74.14   | 100.00 |
| Total  | 321   | 100.00  |        |

-> quantile\_ii = 5, treatment\_binary\_ii = 0

| female | Freq. | Percent | Cum.   |
|--------|-------|---------|--------|
| 0      | 392   | 32.56   | 32.56  |
| 1      | 812   | 67.44   | 100.00 |
| Total  | 1,204 | 100.00  |        |

-> quantile\_ii = 5, treatment\_binary\_ii = 1

| female | Freq. | Percent | Cum.   |
|--------|-------|---------|--------|
| 0      | 109   | 33.96   | 33.96  |
| 1      | 212   | 66.04   | 100.00 |
| Total  | 321   | 100.00  |        |

. by quantile\_ii treatment\_binary\_ii, sort: tabulate CPT\_baseline

-> quantile\_ii = 1, treatment\_binary\_ii = 0

| CPT_baseline | Freq. | Percent | Cum.   |
|--------------|-------|---------|--------|
| 0            | 707   | 54.47   | 54.47  |
| 1            | 591   | 45.53   | 100.00 |
| Total        | 1,298 | 100.00  |        |

-> quantile\_ii = 1, treatment\_binary\_ii = 1

| CPT_baseline | Freq. | Percent | Cum.   |
|--------------|-------|---------|--------|
| 0            | 124   | 54.39   | 54.39  |
| 1            | 104   | 45.61   | 100.00 |
| Total        | 228   | 100.00  |        |

-> quantile\_ii = 2, treatment\_binary\_ii = 0

| CPT_baselin<br>e | Freq. | Percent | Cum.   |
|------------------|-------|---------|--------|
| 0                | 838   | 65.52   | 65.52  |
| 1                | 441   | 34.48   | 100.00 |
| Total            | 1,279 | 100.00  |        |

-> quantile\_ii = 2, treatment\_binary\_ii = 1

| CPT_baselin<br>e | Freq. | Percent | Cum.   |
|------------------|-------|---------|--------|
| 0                | 154   | 62.10   | 62.10  |
| 1                | 94    | 37.90   | 100.00 |
| Total            | 248   | 100.00  |        |

-> quantile\_ii = 3, treatment\_binary\_ii = 0

| CPT_baselin<br>e | Freq. | Percent | Cum.   |
|------------------|-------|---------|--------|
| 0                | 848   | 65.89   | 65.89  |
| 1                | 439   | 34.11   | 100.00 |
| Total            | 1,287 | 100.00  |        |

-> quantile\_ii = 3, treatment\_binary\_ii = 1

| CPT_baselin<br>e | Freq. | Percent | Cum.   |
|------------------|-------|---------|--------|
| 0                | 159   | 66.25   | 66.25  |
| 1                | 81    | 33.75   | 100.00 |
| Total            | 240   | 100.00  |        |

-> quantile\_ii = 4, treatment\_binary\_ii = 0

| CPT_baselin<br>e | Freq. | Percent | Cum.   |
|------------------|-------|---------|--------|
| 0                | 866   | 72.05   | 72.05  |
| 1                | 336   | 27.95   | 100.00 |
| Total            | 1,202 | 100.00  |        |

-> quantile\_ii = 4, treatment\_binary\_ii = 1

| CPT_baselin<br>e | Freq. | Percent | Cum.   |
|------------------|-------|---------|--------|
| 0                | 232   | 72.27   | 72.27  |
| 1                | 89    | 27.73   | 100.00 |
| Total            | 321   | 100.00  |        |

-> quantile\_ii = 5, treatment\_binary\_ii = 0

| CPT_baselin<br>e | Freq. | Percent | Cum.   |
|------------------|-------|---------|--------|
| 0                | 953   | 79.15   | 79.15  |
| 1                | 251   | 20.85   | 100.00 |
| Total            | 1,204 | 100.00  |        |

-> quantile\_ii = 5, treatment\_binary\_ii = 1

| CPT_baselin<br>e | Freq. | Percent | Cum.   |
|------------------|-------|---------|--------|
| 0                | 263   | 81.93   | 81.93  |
| 1                | 58    | 18.07   | 100.00 |
| Total            | 321   | 100.00  |        |

. by quantile\_ii treatment\_binary\_ii, sort: tabulate CPM\_baseline

-> quantile\_ii = 1, treatment\_binary\_ii = 0

| CPM_baselin<br>e | Freq. | Percent | Cum.   |
|------------------|-------|---------|--------|
| 0                | 1,194 | 91.99   | 91.99  |
| 1                | 104   | 8.01    | 100.00 |
| Total            | 1,298 | 100.00  |        |

-> quantile\_ii = 1, treatment\_binary\_ii = 1

| CPM_baselin<br>e | Freq. | Percent | Cum.   |
|------------------|-------|---------|--------|
| 0                | 215   | 94.30   | 94.30  |
| 1                | 13    | 5.70    | 100.00 |
| Total            | 228   | 100.00  |        |

-> quantile\_ii = 2, treatment\_binary\_ii = 0

| CPM_baselin<br>e | Freq. | Percent | Cum.   |
|------------------|-------|---------|--------|
| 0                | 989   | 77.33   | 77.33  |
| 1                | 290   | 22.67   | 100.00 |
| Total            | 1,279 | 100.00  |        |

-> quantile\_ii = 2, treatment\_binary\_ii = 1

| CPM_baselin<br>e | Freq. | Percent | Cum.   |
|------------------|-------|---------|--------|
| 0                | 197   | 79.44   | 79.44  |
| 1                | 51    | 20.56   | 100.00 |
| Total            | 248   | 100.00  |        |

-> quantile\_ii = 3, treatment\_binary\_ii = 0

| CPM_baselin<br>e | Freq. | Percent | Cum.   |
|------------------|-------|---------|--------|
| 0                | 822   | 63.87   | 63.87  |
| 1                | 465   | 36.13   | 100.00 |
| Total            | 1,287 | 100.00  |        |

-> quantile\_ii = 3, treatment\_binary\_ii = 1

| CPM_baselin<br>e | Freq. | Percent | Cum.   |
|------------------|-------|---------|--------|
| 0                | 144   | 60.00   | 60.00  |
| 1                | 96    | 40.00   | 100.00 |
| Total            | 240   | 100.00  |        |

-> quantile\_ii = 4, treatment\_binary\_ii = 0

| CPM_baselin<br>e | Freq. | Percent | Cum.   |
|------------------|-------|---------|--------|
| 0                | 853   | 70.97   | 70.97  |
| 1                | 349   | 29.03   | 100.00 |
| Total            | 1,202 | 100.00  |        |

-> quantile\_ii = 4, treatment\_binary\_ii = 1

| CPM_baselin<br>e | Freq. | Percent | Cum.   |
|------------------|-------|---------|--------|
| 0                | 231   | 71.96   | 71.96  |
| 1                | 90    | 28.04   | 100.00 |
| Total            | 321   | 100.00  |        |

-> quantile\_ii = 5, treatment\_binary\_ii = 0

| CPM_baselin<br>e | Freq. | Percent | Cum.   |
|------------------|-------|---------|--------|
| 0                | 759   | 63.04   | 63.04  |
| 1                | 445   | 36.96   | 100.00 |
| Total            | 1,204 | 100.00  |        |

-> quantile\_ii = 5, treatment\_binary\_ii = 1

| CPM_baselin<br>e | Freq. | Percent | Cum.   |
|------------------|-------|---------|--------|
| 0                | 190   | 59.19   | 59.19  |
| 1                | 131   | 40.81   | 100.00 |
| Total            | 321   | 100.00  |        |

. by quantile\_ii treatment\_binary\_ii, sort: tabulate ChP\_baseline

---

-> quantile\_ii = 1, treatment\_binary\_ii = 0

| ChP_baselin<br>e | Freq. | Percent | Cum.   |
|------------------|-------|---------|--------|
| <hr/>            |       |         |        |
| 0                | 387   | 29.82   | 29.82  |
| 1                | 911   | 70.18   | 100.00 |
| <hr/>            |       |         |        |
| Total            | 1,298 | 100.00  |        |

---

-> quantile\_ii = 1, treatment\_binary\_ii = 1

| ChP_baselin<br>e | Freq. | Percent | Cum.   |
|------------------|-------|---------|--------|
| <hr/>            |       |         |        |
| 0                | 78    | 34.21   | 34.21  |
| 1                | 150   | 65.79   | 100.00 |
| <hr/>            |       |         |        |
| Total            | 228   | 100.00  |        |

---

-> quantile\_ii = 2, treatment\_binary\_ii = 0

| ChP_baselin<br>e | Freq. | Percent | Cum.   |
|------------------|-------|---------|--------|
| <hr/>            |       |         |        |
| 0                | 394   | 30.81   | 30.81  |
| 1                | 885   | 69.19   | 100.00 |
| <hr/>            |       |         |        |
| Total            | 1,279 | 100.00  |        |

---

-> quantile\_ii = 2, treatment\_binary\_ii = 1

| ChP_baselin<br>e | Freq. | Percent | Cum.   |
|------------------|-------|---------|--------|
| <hr/>            |       |         |        |
| 0                | 81    | 32.66   | 32.66  |
| 1                | 167   | 67.34   | 100.00 |
| <hr/>            |       |         |        |
| Total            | 248   | 100.00  |        |

---

-> quantile\_ii = 3, treatment\_binary\_ii = 0

| ChP_baselin<br>e | Freq. | Percent | Cum.   |
|------------------|-------|---------|--------|
| <hr/>            |       |         |        |
| 0                | 402   | 31.24   | 31.24  |
| 1                | 885   | 68.76   | 100.00 |
| <hr/>            |       |         |        |
| Total            | 1,287 | 100.00  |        |

---

-> quantile\_ii = 3, treatment\_binary\_ii = 1

| ChP_baselin<br>e | Freq. | Percent | Cum.   |
|------------------|-------|---------|--------|
| <hr/>            |       |         |        |
| 0                | 62    | 25.83   | 25.83  |
| 1                | 178   | 74.17   | 100.00 |
| <hr/>            |       |         |        |
| Total            | 240   | 100.00  |        |

-> quantile\_ii = 4, treatment\_binary\_ii = 0

| ChP_baselin<br>e | Freq. | Percent | Cum.   |
|------------------|-------|---------|--------|
| 0                | 409   | 34.03   | 34.03  |
| 1                | 793   | 65.97   | 100.00 |
| Total            | 1,202 | 100.00  |        |

-> quantile\_ii = 4, treatment\_binary\_ii = 1

| ChP_baselin<br>e | Freq. | Percent | Cum.   |
|------------------|-------|---------|--------|
| 0                | 108   | 33.64   | 33.64  |
| 1                | 213   | 66.36   | 100.00 |
| Total            | 321   | 100.00  |        |

-> quantile\_ii = 5, treatment\_binary\_ii = 0

| ChP_baselin<br>e | Freq. | Percent | Cum.   |
|------------------|-------|---------|--------|
| 0                | 434   | 36.05   | 36.05  |
| 1                | 770   | 63.95   | 100.00 |
| Total            | 1,204 | 100.00  |        |

-> quantile\_ii = 5, treatment\_binary\_ii = 1

| ChP_baselin<br>e | Freq. | Percent | Cum.   |
|------------------|-------|---------|--------|
| 0                | 114   | 35.51   | 35.51  |
| 1                | 207   | 64.49   | 100.00 |
| Total            | 321   | 100.00  |        |

. by quantile\_ii treatment\_binary\_ii, sort: summarize \_06\_age \_11\_init\_pain\_score treatment\_hat\_ii

-> quantile\_ii = 1, treatment\_binary\_ii = 0

| Variable     | Obs   | Mean     | Std. dev. | Min      | Max      |
|--------------|-------|----------|-----------|----------|----------|
| _06_age      | 1,298 | 63.09861 | 6.564864  | 50       | 90       |
| _11_init_p~e | 1,298 | 4.948382 | 1.688444  | 1        | 10       |
| treatme~t_ii | 1,298 | .1462897 | .0076393  | .1103216 | .1558711 |

-> quantile\_ii = 1, treatment\_binary\_ii = 1

| Variable     | Obs | Mean     | Std. dev. | Min      | Max      |
|--------------|-----|----------|-----------|----------|----------|
| _06_age      | 228 | 62.57895 | 6.348741  | 50       | 82       |
| _11_init_p~e | 228 | 5.096491 | 1.699802  | 1        | 10       |
| treatme~t_ii | 228 | .1468731 | .0072443  | .1196765 | .1558195 |

-> quantile\_ii = 2, treatment\_binary\_ii = 0

| Variable      | Obs   | Mean     | Std. dev. | Min      | Max      |
|---------------|-------|----------|-----------|----------|----------|
| __06_age      | 1,279 | 54.44253 | 5.987044  | 41       | 72       |
| __11_init_p~e | 1,279 | 5.435496 | 1.759932  | 1        | 10       |
| treatme~t__ii | 1,279 | .1630958 | .0039626  | .1559074 | .1697194 |

-> quantile\_ii = 2, treatment\_binary\_ii = 1

| Variable      | Obs | Mean     | Std. dev. | Min   | Max      |
|---------------|-----|----------|-----------|-------|----------|
| __06_age      | 248 | 53.92339 | 5.302029  | 42    | 70       |
| __11_init_p~e | 248 | 5.370968 | 1.532206  | 1     | 9        |
| treatme~t__ii | 248 | .1631158 | .0040437  | .1561 | .1696943 |

-> quantile\_ii = 3, treatment\_binary\_ii = 0

| Variable      | Obs   | Mean     | Std. dev. | Min      | Max      |
|---------------|-------|----------|-----------|----------|----------|
| __06_age      | 1,287 | 47.63559 | 7.180417  | 32       | 65       |
| __11_init_p~e | 1,287 | 5.407148 | 1.827017  | 1        | 10       |
| treatme~t__ii | 1,287 | .1764735 | .0038452  | .1697345 | .1832667 |

-> quantile\_ii = 3, treatment\_binary\_ii = 1

| Variable      | Obs | Mean     | Std. dev. | Min      | Max      |
|---------------|-----|----------|-----------|----------|----------|
| __06_age      | 240 | 48.15417 | 7.055457  | 34       | 63       |
| __11_init_p~e | 240 | 5.4375   | 1.598983  | 1        | 10       |
| treatme~t__ii | 240 | .1764539 | .0038542  | .1699227 | .1832667 |

-> quantile\_ii = 4, treatment\_binary\_ii = 0

| Variable      | Obs   | Mean     | Std. dev. | Min      | Max      |
|---------------|-------|----------|-----------|----------|----------|
| __06_age      | 1,202 | 38.56073 | 7.120941  | 23       | 57       |
| __11_init_p~e | 1,202 | 5.580699 | 1.843293  | 1        | 10       |
| treatme~t__ii | 1,202 | .1912169 | .0048071  | .1832808 | .1997181 |

-> quantile\_ii = 4, treatment\_binary\_ii = 1

| Variable      | Obs | Mean     | Std. dev. | Min     | Max      |
|---------------|-----|----------|-----------|---------|----------|
| __06_age      | 321 | 38.46729 | 6.850617  | 25      | 55       |
| __11_init_p~e | 321 | 5.626168 | 1.781099  | 1       | 10       |
| treatme~t__ii | 321 | .1912333 | .0048254  | .183349 | .1997181 |

-> quantile\_ii = 5, treatment\_binary\_ii = 0

| Variable      | Obs   | Mean     | Std. dev. | Min      | Max      |
|---------------|-------|----------|-----------|----------|----------|
| __06_age      | 1,204 | 28.3289  | 6.949273  | 18       | 48       |
| __11_init_p~e | 1,204 | 5.925249 | 1.824665  | 1        | 10       |
| treatme~t__ii | 1,204 | .2130015 | .0103638  | .1997283 | .2551354 |

-> quantile\_ii = 5, treatment\_binary\_ii = 1

| Variable | Obs | Mean     | Std. dev. | Min | Max |
|----------|-----|----------|-----------|-----|-----|
| __06_age | 321 | 28.76947 | 7.220834  | 18  | 46  |



```
_l1_init_p~e |    321  5.825545  1.757333    2    10
treatme~t_ii |    321  .2131587  .0109136  .1997283  .2574059
```

```
.
. by quantile_li treatment_binary_li, sort: tabulate female
```

```
-> quantile_li = 1, treatment_binary_li = 0
```

| female | Freq. | Percent | Cum.   |
|--------|-------|---------|--------|
| 0      | 502   | 37.77   | 37.77  |
| 1      | 827   | 62.23   | 100.00 |
| Total  | 1,329 | 100.00  |        |

```
-> quantile_li = 1, treatment_binary_li = 1
```

| female | Freq. | Percent | Cum.   |
|--------|-------|---------|--------|
| 0      | 73    | 36.87   | 36.87  |
| 1      | 125   | 63.13   | 100.00 |
| Total  | 198   | 100.00  |        |

```
-> quantile_li = 2, treatment_binary_li = 0
```

| female | Freq. | Percent | Cum.   |
|--------|-------|---------|--------|
| 0      | 319   | 24.22   | 24.22  |
| 1      | 998   | 75.78   | 100.00 |
| Total  | 1,317 | 100.00  |        |

```
-> quantile_li = 2, treatment_binary_li = 1
```

| female | Freq. | Percent | Cum.   |
|--------|-------|---------|--------|
| 0      | 57    | 26.39   | 26.39  |
| 1      | 159   | 73.61   | 100.00 |
| Total  | 216   | 100.00  |        |

```
-> quantile_li = 3, treatment_binary_li = 0
```

| female | Freq. | Percent | Cum.   |
|--------|-------|---------|--------|
| 0      | 371   | 29.24   | 29.24  |
| 1      | 898   | 70.76   | 100.00 |
| Total  | 1,269 | 100.00  |        |

```
-> quantile_li = 3, treatment_binary_li = 1
```

| female | Freq. | Percent | Cum.   |
|--------|-------|---------|--------|
| 0      | 72    | 29.03   | 29.03  |
| 1      | 176   | 70.97   | 100.00 |
| Total  | 248   | 100.00  |        |

-> quantile\_li = 4, treatment\_binary\_li = 0

| female | Freq. | Percent | Cum.   |
|--------|-------|---------|--------|
| 0      | 390   | 30.61   | 30.61  |
| 1      | 884   | 69.39   | 100.00 |
| Total  | 1,274 | 100.00  |        |

-> quantile\_li = 4, treatment\_binary\_li = 1

| female | Freq. | Percent | Cum.   |
|--------|-------|---------|--------|
| 0      | 62    | 24.60   | 24.60  |
| 1      | 190   | 75.40   | 100.00 |
| Total  | 252   | 100.00  |        |

-> quantile\_li = 5, treatment\_binary\_li = 0

| female | Freq. | Percent | Cum.   |
|--------|-------|---------|--------|
| 0      | 288   | 23.61   | 23.61  |
| 1      | 932   | 76.39   | 100.00 |
| Total  | 1,220 | 100.00  |        |

-> quantile\_li = 5, treatment\_binary\_li = 1

| female | Freq. | Percent | Cum.   |
|--------|-------|---------|--------|
| 0      | 83    | 27.21   | 27.21  |
| 1      | 222   | 72.79   | 100.00 |
| Total  | 305   | 100.00  |        |

. by quantile\_li treatment\_binary\_li, sort: tabulate CPT\_baseline

-> quantile\_li = 1, treatment\_binary\_li = 0

| CPT_baseline | Freq. | Percent | Cum.   |
|--------------|-------|---------|--------|
| 0            | 1,086 | 81.72   | 81.72  |
| 1            | 243   | 18.28   | 100.00 |
| Total        | 1,329 | 100.00  |        |

-> quantile\_li = 1, treatment\_binary\_li = 1

| CPT_baseline | Freq. | Percent | Cum.   |
|--------------|-------|---------|--------|
| 0            | 172   | 86.87   | 86.87  |
| 1            | 26    | 13.13   | 100.00 |
| Total        | 198   | 100.00  |        |

-> quantile\_li = 2, treatment\_binary\_li = 0

| CPT_baselin<br>e | Freq. | Percent | Cum.   |
|------------------|-------|---------|--------|
| 0                | 884   | 67.12   | 67.12  |
| 1                | 433   | 32.88   | 100.00 |
| Total            | 1,317 | 100.00  |        |

-> quantile\_li = 2, treatment\_binary\_li = 1

| CPT_baselin<br>e | Freq. | Percent | Cum.   |
|------------------|-------|---------|--------|
| 0                | 137   | 63.43   | 63.43  |
| 1                | 79    | 36.57   | 100.00 |
| Total            | 216   | 100.00  |        |

-> quantile\_li = 3, treatment\_binary\_li = 0

| CPT_baselin<br>e | Freq. | Percent | Cum.   |
|------------------|-------|---------|--------|
| 0                | 809   | 63.75   | 63.75  |
| 1                | 460   | 36.25   | 100.00 |
| Total            | 1,269 | 100.00  |        |

-> quantile\_li = 3, treatment\_binary\_li = 1

| CPT_baselin<br>e | Freq. | Percent | Cum.   |
|------------------|-------|---------|--------|
| 0                | 154   | 62.10   | 62.10  |
| 1                | 94    | 37.90   | 100.00 |
| Total            | 248   | 100.00  |        |

-> quantile\_li = 4, treatment\_binary\_li = 0

| CPT_baselin<br>e | Freq. | Percent | Cum.   |
|------------------|-------|---------|--------|
| 0                | 830   | 65.15   | 65.15  |
| 1                | 444   | 34.85   | 100.00 |
| Total            | 1,274 | 100.00  |        |

-> quantile\_li = 4, treatment\_binary\_li = 1

| CPT_baselin<br>e | Freq. | Percent | Cum.   |
|------------------|-------|---------|--------|
| 0                | 175   | 69.44   | 69.44  |
| 1                | 77    | 30.56   | 100.00 |
| Total            | 252   | 100.00  |        |

-> quantile\_li = 5, treatment\_binary\_li = 0

| CPT_baselin<br>e | Freq. | Percent | Cum.   |
|------------------|-------|---------|--------|
| 0                | 726   | 59.51   | 59.51  |
| 1                | 494   | 40.49   | 100.00 |
| Total            | 1,220 | 100.00  |        |

-> quantile\_li = 5, treatment\_binary\_li = 1

| CPT_baselin<br>e | Freq. | Percent | Cum.   |
|------------------|-------|---------|--------|
| 0                | 171   | 56.07   | 56.07  |
| 1                | 134   | 43.93   | 100.00 |
| Total            | 305   | 100.00  |        |

. by quantile\_li treatment\_binary\_li, sort: tabulate CPM\_baseline

-> quantile\_li = 1, treatment\_binary\_li = 0

| CPM_baselin<br>e | Freq. | Percent | Cum.   |
|------------------|-------|---------|--------|
| 0                | 1,027 | 77.28   | 77.28  |
| 1                | 302   | 22.72   | 100.00 |
| Total            | 1,329 | 100.00  |        |

-> quantile\_li = 1, treatment\_binary\_li = 1

| CPM_baselin<br>e | Freq. | Percent | Cum.   |
|------------------|-------|---------|--------|
| 0                | 144   | 72.73   | 72.73  |
| 1                | 54    | 27.27   | 100.00 |
| Total            | 198   | 100.00  |        |

-> quantile\_li = 2, treatment\_binary\_li = 0

| CPM_baselin<br>e | Freq. | Percent | Cum.   |
|------------------|-------|---------|--------|
| 0                | 929   | 70.54   | 70.54  |
| 1                | 388   | 29.46   | 100.00 |
| Total            | 1,317 | 100.00  |        |

-> quantile\_li = 2, treatment\_binary\_li = 1

| CPM_baselin<br>e | Freq. | Percent | Cum.   |
|------------------|-------|---------|--------|
| 0                | 158   | 73.15   | 73.15  |
| 1                | 58    | 26.85   | 100.00 |
| Total            | 216   | 100.00  |        |

-> quantile\_li = 3, treatment\_binary\_li = 0

| CPM_baselin<br>e | Freq. | Percent | Cum.   |
|------------------|-------|---------|--------|
| 0                | 855   | 67.38   | 67.38  |
| 1                | 414   | 32.62   | 100.00 |
| Total            | 1,269 | 100.00  |        |

-> quantile\_li = 3, treatment\_binary\_li = 1

| CPM_baselin<br>e | Freq. | Percent | Cum.   |
|------------------|-------|---------|--------|
| 0                | 172   | 69.35   | 69.35  |
| 1                | 76    | 30.65   | 100.00 |
| Total            | 248   | 100.00  |        |

-> quantile\_li = 4, treatment\_binary\_li = 0

| CPM_baselin<br>e | Freq. | Percent | Cum.   |
|------------------|-------|---------|--------|
| 0                | 953   | 74.80   | 74.80  |
| 1                | 321   | 25.20   | 100.00 |
| Total            | 1,274 | 100.00  |        |

-> quantile\_li = 4, treatment\_binary\_li = 1

| CPM_baselin<br>e | Freq. | Percent | Cum.   |
|------------------|-------|---------|--------|
| 0                | 184   | 73.02   | 73.02  |
| 1                | 68    | 26.98   | 100.00 |
| Total            | 252   | 100.00  |        |

-> quantile\_li = 5, treatment\_binary\_li = 0

| CPM_baselin<br>e | Freq. | Percent | Cum.   |
|------------------|-------|---------|--------|
| 0                | 935   | 76.64   | 76.64  |
| 1                | 285   | 23.36   | 100.00 |
| Total            | 1,220 | 100.00  |        |

-> quantile\_li = 5, treatment\_binary\_li = 1

| CPM_baselin<br>e | Freq. | Percent | Cum.   |
|------------------|-------|---------|--------|
| 0                | 237   | 77.70   | 77.70  |
| 1                | 68    | 22.30   | 100.00 |
| Total            | 305   | 100.00  |        |

. by quantile\_li treatment\_binary\_li, sort: tabulate ChP\_baseline

---

-> quantile\_li = 1, treatment\_binary\_li = 0

| ChP_baselin<br>e | Freq. | Percent | Cum.   |
|------------------|-------|---------|--------|
| <hr/>            |       |         |        |
| 0                | 524   | 39.43   | 39.43  |
| 1                | 805   | 60.57   | 100.00 |
| <hr/>            |       |         |        |
| Total            | 1,329 | 100.00  |        |

---

-> quantile\_li = 1, treatment\_binary\_li = 1

| ChP_baselin<br>e | Freq. | Percent | Cum.   |
|------------------|-------|---------|--------|
| <hr/>            |       |         |        |
| 0                | 72    | 36.36   | 36.36  |
| 1                | 126   | 63.64   | 100.00 |
| <hr/>            |       |         |        |
| Total            | 198   | 100.00  |        |

---

-> quantile\_li = 2, treatment\_binary\_li = 0

| ChP_baselin<br>e | Freq. | Percent | Cum.   |
|------------------|-------|---------|--------|
| <hr/>            |       |         |        |
| 0                | 406   | 30.83   | 30.83  |
| 1                | 911   | 69.17   | 100.00 |
| <hr/>            |       |         |        |
| Total            | 1,317 | 100.00  |        |

---

-> quantile\_li = 2, treatment\_binary\_li = 1

| ChP_baselin<br>e | Freq. | Percent | Cum.   |
|------------------|-------|---------|--------|
| <hr/>            |       |         |        |
| 0                | 58    | 26.85   | 26.85  |
| 1                | 158   | 73.15   | 100.00 |
| <hr/>            |       |         |        |
| Total            | 216   | 100.00  |        |

---

-> quantile\_li = 3, treatment\_binary\_li = 0

| ChP_baselin<br>e | Freq. | Percent | Cum.   |
|------------------|-------|---------|--------|
| <hr/>            |       |         |        |
| 0                | 412   | 32.47   | 32.47  |
| 1                | 857   | 67.53   | 100.00 |
| <hr/>            |       |         |        |
| Total            | 1,269 | 100.00  |        |

---

-> quantile\_li = 3, treatment\_binary\_li = 1

| ChP_baselin<br>e | Freq. | Percent | Cum.   |
|------------------|-------|---------|--------|
| <hr/>            |       |         |        |
| 0                | 76    | 30.65   | 30.65  |
| 1                | 172   | 69.35   | 100.00 |
| <hr/>            |       |         |        |
| Total            | 248   | 100.00  |        |

-> quantile\_li = 4, treatment\_binary\_li = 0

| ChP_baselin<br>e | Freq. | Percent | Cum.   |
|------------------|-------|---------|--------|
| 0                | 431   | 33.83   | 33.83  |
| 1                | 843   | 66.17   | 100.00 |
| Total            | 1,274 | 100.00  |        |

-> quantile\_li = 4, treatment\_binary\_li = 1

| ChP_baselin<br>e | Freq. | Percent | Cum.   |
|------------------|-------|---------|--------|
| 0                | 82    | 32.54   | 32.54  |
| 1                | 170   | 67.46   | 100.00 |
| Total            | 252   | 100.00  |        |

-> quantile\_li = 5, treatment\_binary\_li = 0

| ChP_baselin<br>e | Freq. | Percent | Cum.   |
|------------------|-------|---------|--------|
| 0                | 308   | 25.25   | 25.25  |
| 1                | 912   | 74.75   | 100.00 |
| Total            | 1,220 | 100.00  |        |

-> quantile\_li = 5, treatment\_binary\_li = 1

| ChP_baselin<br>e | Freq. | Percent | Cum.   |
|------------------|-------|---------|--------|
| 0                | 100   | 32.79   | 32.79  |
| 1                | 205   | 67.21   | 100.00 |
| Total            | 305   | 100.00  |        |

. by quantile\_li treatment\_binary\_li, sort: summarize \_06\_age \_11\_init\_pain\_score treatment\_hat\_li

-> quantile\_li = 1, treatment\_binary\_li = 0

| Variable     | Obs   | Mean     | Std. dev. | Min      | Max      |
|--------------|-------|----------|-----------|----------|----------|
| _06_age      | 1,329 | 63.98796 | 6.150828  | 52       | 87       |
| _11_init_p~e | 1,329 | 5.360421 | 1.803268  | 1        | 10       |
| treatme~t_li | 1,329 | .1291872 | .007649   | .0972563 | .1387815 |

-> quantile\_li = 1, treatment\_binary\_li = 1

| Variable     | Obs | Mean     | Std. dev. | Min      | Max      |
|--------------|-----|----------|-----------|----------|----------|
| _06_age      | 198 | 63.50505 | 5.995555  | 52       | 90       |
| _11_init_p~e | 198 | 5.373737 | 1.65922   | 2        | 10       |
| treatme~t_li | 198 | .1298885 | .0071788  | .1073444 | .1387815 |

-> quantile\_li = 2, treatment\_binary\_li = 0

| Variable      | Obs   | Mean     | Std. dev. | Min      | Max      |
|---------------|-------|----------|-----------|----------|----------|
| __06_age      | 1,317 | 55.08656 | 4.212275  | 44       | 67       |
| __11_init_p~e | 1,317 | 5.494305 | 1.730999  | 1        | 10       |
| treatme~t_li  | 1,317 | .1449562 | .0034388  | .1388047 | .1508268 |

-> quantile\_li = 2, treatment\_binary\_li = 1

| Variable      | Obs | Mean     | Std. dev. | Min      | Max      |
|---------------|-----|----------|-----------|----------|----------|
| __06_age      | 216 | 55.36574 | 4.13949   | 44       | 63       |
| __11_init_p~e | 216 | 5.481481 | 1.80944   | 1        | 10       |
| treatme~t_li  | 216 | .1447938 | .0036209  | .1389287 | .1508268 |

-> quantile\_li = 3, treatment\_binary\_li = 0

| Variable      | Obs   | Mean     | Std. dev. | Min      | Max      |
|---------------|-------|----------|-----------|----------|----------|
| __06_age      | 1,269 | 47.38061 | 5.241875  | 35       | 60       |
| __11_init_p~e | 1,269 | 5.51379  | 1.789606  | 1        | 10       |
| treatme~t_li  | 1,269 | .157621  | .0039921  | .1508433 | .1646879 |

-> quantile\_li = 3, treatment\_binary\_li = 1

| Variable      | Obs | Mean     | Std. dev. | Min      | Max      |
|---------------|-----|----------|-----------|----------|----------|
| __06_age      | 248 | 47.35081 | 5.168607  | 36       | 60       |
| __11_init_p~e | 248 | 5.41129  | 1.817647  | 1        | 10       |
| treatme~t_li  | 248 | .1578156 | .0036752  | .1509002 | .1644891 |

-> quantile\_li = 4, treatment\_binary\_li = 0

| Variable      | Obs   | Mean     | Std. dev. | Min      | Max      |
|---------------|-------|----------|-----------|----------|----------|
| __06_age      | 1,274 | 38.27237 | 5.05496   | 26       | 51       |
| __11_init_p~e | 1,274 | 5.419152 | 1.818594  | 1        | 10       |
| treatme~t_li  | 1,274 | .1725989 | .0048173  | .1647104 | .1813426 |

-> quantile\_li = 4, treatment\_binary\_li = 1

| Variable      | Obs | Mean     | Std. dev. | Min      | Max      |
|---------------|-----|----------|-----------|----------|----------|
| __06_age      | 252 | 38.16667 | 5.023054  | 28       | 51       |
| __11_init_p~e | 252 | 5.626984 | 1.828217  | 1        | 10       |
| treatme~t_li  | 252 | .1728345 | .0049148  | .1647104 | .1813138 |

-> quantile\_li = 5, treatment\_binary\_li = 0

| Variable      | Obs   | Mean     | Std. dev. | Min      | Max      |
|---------------|-------|----------|-----------|----------|----------|
| __06_age      | 1,220 | 27.35902 | 5.643697  | 18       | 42       |
| __11_init_p~e | 1,220 | 5.513934 | 1.810271  | 1        | 10       |
| treatme~t_li  | 1,220 | .1946976 | .0101548  | .1814277 | .2297473 |

-> quantile\_li = 5, treatment\_binary\_li = 1

| Variable | Obs | Mean     | Std. dev. | Min | Max |
|----------|-----|----------|-----------|-----|-----|
| __06_age | 305 | 27.32459 | 5.609809  | 18  | 42  |



|              |     |          |          |          |          |
|--------------|-----|----------|----------|----------|----------|
| _l1_init_p~e | 305 | 5.42623  | 1.926776 | 1        | 10       |
| treatme~t_li | 305 | .1943405 | .0092391 | .1814632 | .2241988 |

.  
end of do-file

.
