# Supplementary material for: The Effect of Therapeutic Adherence on the Effectiveness of a Digital Therapeutic Exercise Program: A Propensity Score Matching Analysis
Source: MDPI journal article supplement (doi:10.3390/healthcare11192614), 2023-09-23
Supplement: s1 [file s1]

**Supplementary File 6:** Differential probability of achieving a clinically relevant improvement of pain intensity at the termination of use, PS-matched analysis for patients with high use intensity (HI), intermediate use intensity (II), low use intensity (LI) and no relevant use intensity (ie, < 1 routine/week, sub-LI). The Bonferroni method was used to adjust the results for multiple testing; significance can be assumed if  $P < 0.0167$ . Sensitivity analysis with a threshold of a 1-point VNRS improvement in accordance with Leiva et al. (Ref. 10 in main article).

|                     | n     | Coefficient | Robust SE | z    | $P <  z $ | 95%-CI       |
|---------------------|-------|-------------|-----------|------|-----------|--------------|
| HI vs. II/LI/Sub-LI | 7,628 | 0.1         | 0.0129    | 7.71 | <0.0001   | 0.074-0.125  |
| II vs. LI/Sub-LI    | 2,684 | 0.07        | 0.021     | 3.32 | 0.001     | 0.028-0.108  |
| LI vs. Sub-LI       | 1,326 | 0.07        | 0.043     | 1.63 | 0.104     | -0.014-0.156 |
