# Supplementary material for: The Effect of Therapeutic Adherence on the Effectiveness of a Digital Therapeutic Exercise Program: A Propensity Score Matching Analysis
Source: MDPI journal article supplement (doi:10.3390/healthcare11192614), 2023-09-23
Supplement: s1 [file s1]

**Supplementary File 5:** Achievement of clinically relevant improvement of pain intensity, prior to PS-matching for patients with high use intensity (HI), intermediate use intensity (II), low use intensity (LI) and no relevant use intensity (ie, < 1 routine/week, sub-LI). Sensitivity analysis with a threshold of a 2-point VNRS improvement in accordance with Salaffi et al. (Ref. 11 in main article).

| Usage Profile | Achievement of a clinically relevant improvement of pain intensity at termination of use (%) |
|---------------|----------------------------------------------------------------------------------------------|
| HI            | 41.3                                                                                         |
| II            | 35.8                                                                                         |
| LI            | 27.7                                                                                         |
| Sub-LI        | 27.1                                                                                         |
