# Supplementary material for: The Effect of Therapeutic Adherence on the Effectiveness of a Digital Therapeutic Exercise Program: A Propensity Score Matching Analysis
Source: MDPI journal article supplement (doi:10.3390/healthcare11192614), 2023-09-23

**Supplementary File 2:** Graphical assessment of a region of common support of propensity scores (PS) for patients with high-intensity (hi), intermediate-intensity (ii), and low-intensity (li) use profiles.

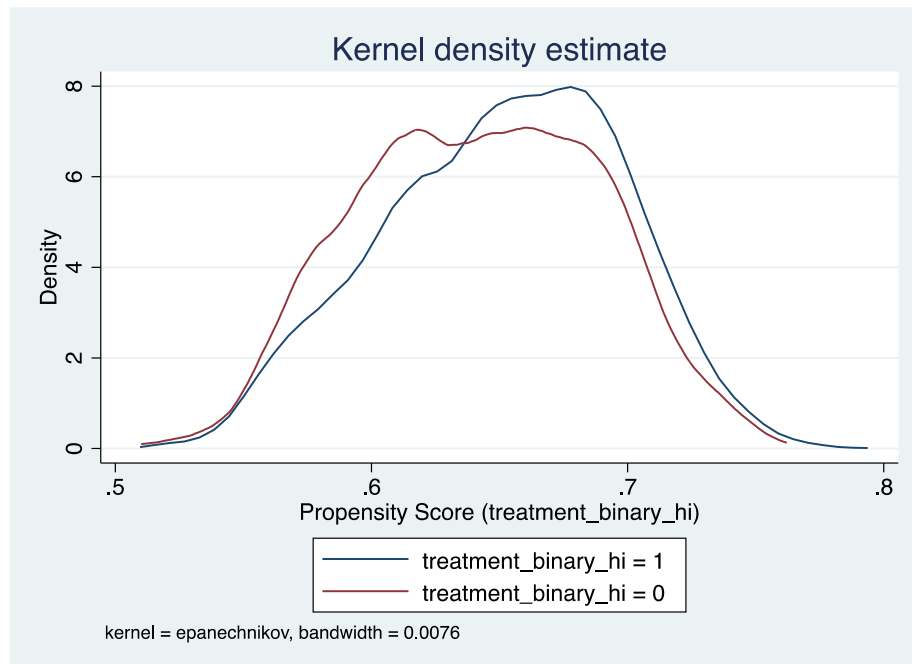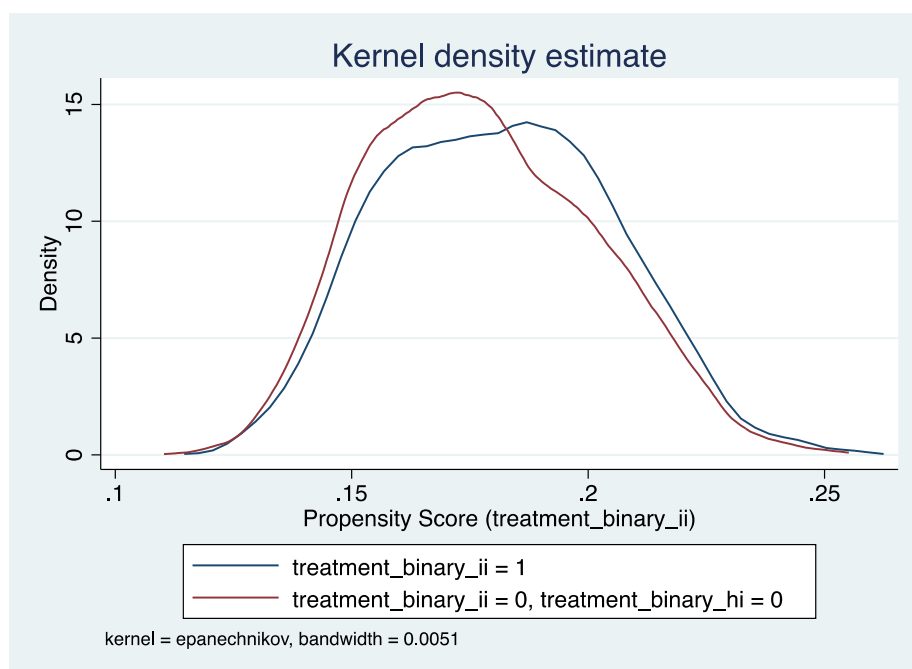

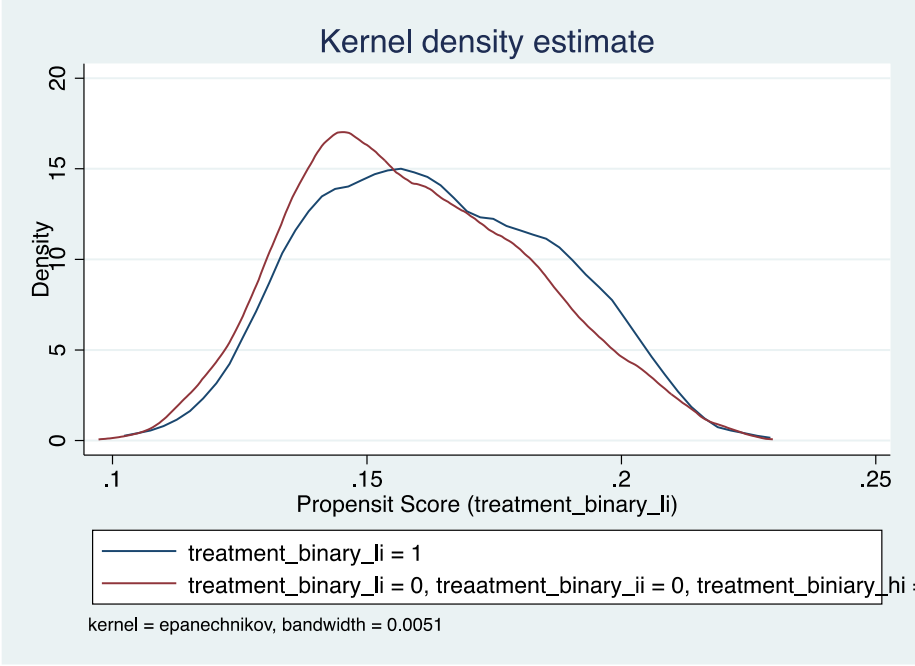

Supplement: s1 [file s1]
