# Supplementary material for: The Effect of Therapeutic Adherence on the Effectiveness of a Digital Therapeutic Exercise Program: A Propensity Score Matching Analysis
Source: Healthcare (Basel). 2023 Sep 23;11(19):2614. doi: 10.3390/healthcare11192614 (PMC10572588; doi:10.3390/healthcare11192614)
Supplement: Supplementary file 1 [file healthcare-11-02614-s001.zip]

Archive with 7 entries (7 files):
- Supplementary_1.pdf
- Supplementary_2.pdf
- Supplementary_3.pdf
- Supplementary_4.pdf
- Supplementary_5.pdf
- Supplementary_6.pdf
- Supplementary_7.pdf
